# Supplementary material for: Innate-like self-reactive B cells infiltrate human renal allografts during transplant rejection
Source: PubMed Central journal article supplement (PMC8285506; doi:10.1038/s41467-021-24615-6), 2021-07-16
Supplement: 41467_2021_24615_MOESM1_ESM.pdf [file 41467_2021_24615_MOESM1_ESM.pdf]

# **Supplementary Information for**

## **“Innate-like, self-reactive B cells infiltrate rejecting human renal allografts”**

Yuta Asano<sup>1</sup>, Joe Daccache<sup>2</sup>, Dharmendra Jain<sup>3</sup>, Kichul Ko<sup>1</sup>, Andrew Kinloch<sup>1</sup>, Margaret Veselits<sup>1</sup>, Donald Wolfgeher<sup>4</sup>, Anthony Chang<sup>5</sup>, Michelle Josephson<sup>6</sup>, Patrick Cunningham<sup>6</sup>, Anat Tambur<sup>7</sup>, Aly A. Khan<sup>5</sup>, Shiv Pillai<sup>8</sup>, Anita S. Chong<sup>3</sup>, Marcus R. Clark<sup>1\*</sup>

<sup>1</sup>Section of Rheumatology and The Knapp Center for Lupus and Immunology Research,  
Department of Medicine, The University of Chicago, Chicago, IL, USA.

<sup>2</sup>Transplantation Research Center, Renal Division, Brigham and Women’s Hospital, Harvard  
Medical School, Boston, MA, USA.

<sup>3</sup>Section of Transplant, Department of Surgery, The University of Chicago, Chicago, IL, USA.

<sup>4</sup>Department of Molecular Genetics and Cell Biology, The University of Chicago, IL, USA.

<sup>5</sup>Department of Pathology, The University of Chicago, Chicago, IL, USA.

<sup>6</sup>Section of Nephrology, Department of Medicine, The University of Chicago, Chicago, IL, USA.

<sup>7</sup>Transplant Immunology Laboratory, Northwestern University, Chicago, IL, USA.

<sup>8</sup>Ragon Institute of Massachusetts General Hospital, Massachusetts Institute of Technology, and  
Department of Medicine, Harvard Medical School, Boston, MA, USA.

\*Corresponding author. Email: [mclark@uchicago.edu](mailto:mclark@uchicago.edu)

| Cohort                        | First                           |                                 |                                 |                                           |                                 | Second   |          |          |          |                                                                         |                                 |                                                                          |          |          |          |
|-------------------------------|---------------------------------|---------------------------------|---------------------------------|-------------------------------------------|---------------------------------|----------|----------|----------|----------|-------------------------------------------------------------------------|---------------------------------|--------------------------------------------------------------------------|----------|----------|----------|
|                               | Kidney 1                        | Kidney 2                        | Kidney 3                        | Kidney 4                                  | Kidney 5                        | Tonsil 1 | Tonsil 2 | Tonsil 3 | Tonsil 4 | Kidney 6                                                                | Kidney 7                        | Kidney 8                                                                 | Tonsil 5 | Tonsil 6 | Tonsil 7 |
| Patient                       |                                 |                                 |                                 |                                           |                                 |          |          |          |          |                                                                         |                                 |                                                                          |          |          |          |
| Gender                        |                                 |                                 | 4 Females and 1 Male            |                                           |                                 |          |          |          |          |                                                                         | 3 Males                         |                                                                          |          |          |          |
| Age                           |                                 |                                 | Mean = 50, s.d. = 15.6          |                                           |                                 |          |          |          |          |                                                                         | Mean = 55, s.d. = 9.5           |                                                                          |          |          |          |
| Kidney survival (yr)          |                                 |                                 | Mean = 11.3, s.d. = 8.6         |                                           |                                 |          |          |          |          |                                                                         | Mean = 9.2, s.d. = 11.1         |                                                                          |          |          |          |
| Disease                       | HT                              | IgAN                            | HT                              | RN                                        | MCKD                            |          |          |          |          | HT, T2D                                                                 | HT                              | T1D                                                                      |          |          |          |
| Diagnosis                     | Chronic AMR                     | Chronic AMR                     | Chronic active AMR              | Chronic active AMR                        | Chronic AMR                     |          |          |          |          | Mixed / Active AMR                                                      | Active AMR                      | Chronic active AMR                                                       |          |          |          |
| DSA                           | No                              | No                              | No                              | Yes                                       | No                              |          |          |          |          | Yes                                                                     | Yes                             | No                                                                       |          |          |          |
| c4d staining, c4d             | 0                               | 0                               | 0                               | 2                                         | 0                               |          |          |          |          | 3                                                                       | 3                               | 1                                                                        |          |          |          |
| tubulitis, t                  | 1                               | 1                               | 0                               | 0                                         | 0                               |          |          |          |          | 3                                                                       | 0                               | 0                                                                        |          |          |          |
| inflammation, i               | 2                               | 1                               | 1                               | 1                                         | 0                               |          |          |          |          | 2                                                                       | 0                               | 1                                                                        |          |          |          |
| intimal arteritis, v          | 0                               | 0                               | 0                               | 0                                         | 0                               |          |          |          |          | 1                                                                       | 0                               | 0                                                                        |          |          |          |
| glomerulitis, g               | 1                               | 2                               | 0                               | 2                                         | 0                               |          |          |          |          | 0                                                                       | 0                               | 0                                                                        |          |          |          |
| interstitial fibrosis, ci     | 2                               | 2                               | 3                               | 1                                         | 1                               |          |          |          |          | 2                                                                       | 1                               | 1                                                                        |          |          |          |
| tubular atrophy, ct           | 2                               | 2                               | 3                               | 1                                         | 1                               |          |          |          |          | 2                                                                       | 1                               | 1                                                                        |          |          |          |
| chr allx gp, cg               | 1b                              | 3                               | 0                               | 3                                         | 0                               |          |          |          |          | 0                                                                       | 0                               | 0                                                                        |          |          |          |
| intimal thickening, cv        | 1                               | 1                               | 0                               | 1                                         | 1                               |          |          |          |          | 3                                                                       | 1                               | 1                                                                        |          |          |          |
| peritubular capillaritis, ptc | 1                               | 2                               | 1                               | 1                                         | 2                               |          |          |          |          | 2                                                                       | 0                               | 0                                                                        |          |          |          |
| total inf, ti                 | 3                               | 3                               | 3                               | 3                                         | 1                               |          |          |          |          | 2                                                                       | 1                               | 2                                                                        |          |          |          |
| I-FITA                        | 3                               | 3                               | 3                               | 2                                         | 2                               |          |          |          |          | 2                                                                       | 1                               | 2                                                                        |          |          |          |
| Cr                            | 1.9                             | 3                               | 1.4                             | 2.4                                       | 1.8                             |          |          |          |          | 11.1                                                                    | 1.4                             | 2.7                                                                      |          |          |          |
| eGFR                          | 36                              | 19                              | 37                              | 29                                        | 30                              |          |          |          |          | 0.96                                                                    | 51                              | 25                                                                       |          |          |          |
| Proteinuria                   | 2.5                             | 2.7                             | 7.2                             | 1                                         | 0.13                            |          |          |          |          | 0.09                                                                    | 14                              | 14                                                                       |          |          |          |
| Latest followup               | Cr 4.2 at 50 months post-biopsy | Cr 4.8 at 56 months post-biopsy | Cr 1.6 at 52 months post-biopsy | Cr 4.3 at 35 months post-biopsy; Deceased | Cr 1.6 at 12 months post-biopsy |          |          |          |          | Cr 10.5 at 34 months post-biopsy; On dialysis since 1 month post-biopsy | Cr 1.1 at 23 months post-biopsy | Cr 6.2 at 22 months post-biopsy; On dialysis since 15 months post-biopsy |          |          |          |
| Cell infiltrates              | T/B aggregates                  | Diffuse                         | Diffuse                         | Diffuse                                   | Diffuse                         |          |          |          |          | T/B aggregates                                                          | T/B aggregates                  | T/B aggregates                                                           |          |          |          |
| Sorted cells                  | 96                              | 336                             | 96                              | 192                                       | 192                             |          |          |          |          | 192                                                                     | 96                              | 96                                                                       | 96       | 96       | 96       |
| Cells after QC                | 71                              | 262                             | 69                              | 77                                        | 176                             |          |          |          |          | 137                                                                     | 51                              | 77                                                                       | 87       | 81       | 84       |

Abbreviations...HT: Hypertension, IgAN: IgA nephropathy, RN: Reflux nephropathy, MCKD: Medullary cystic kidney disease, T1D/T2D: Type-1/2 diabetes, AMR: Antibody-mediated rejection, Cr: Serum creatinine, eGFR: Estimated glomerular filtration rate

## Supplementary Table 1. Patient information.

For transplant patients, age, gender and kidney survival length are masked to protect patients' confidentiality. Tonsil donors are deidentified.

| Ig class | Kidney 1 | Kidney 2 | Kidney 3 | Kidney 4 | Kidney 5 | Tonsil 1 | Tonsil 2 | Tonsil 3 | Tonsil 4 | Kidney 6 | Kidney 7 | Kidney 8 | Tonsil 5 | Tonsil 6 | Tonsil 7 | Total |
|----------|----------|----------|----------|----------|----------|----------|----------|----------|----------|----------|----------|----------|----------|----------|----------|-------|
| IGHM     | 27       | 165      | 31       | 68       | 111      | 33       | 20       | 15       | 10       | 13       | 19       | 33       | 37       | 21       | 43       | 646   |
| IGHD     | 0        | 10       | 0        | 0        | 0        | 0        | 0        | 1        | 0        | 10       | 2        | 1        | 8        | 14       | 26       | 72    |
| IGHA1    | 10       | 13       | 9        | 2        | 18       | 1        | 1        | 3        | 0        | 10       | 7        | 11       | 8        | 11       | 3        | 107   |
| IGHA2    | 1        | 3        | 1        | 0        | 2        | 0        | 0        | 0        | 0        | 0        | 1        | 4        | 1        | 0        | 1        | 14    |
| IGHG1    | 23       | 52       | 19       | 2        | 30       | 6        | 15       | 1        | 11       | 88       | 16       | 11       | 16       | 23       | 4        | 317   |
| IGHG2    | 4        | 13       | 2        | 3        | 11       | 0        | 1        | 0        | 0        | 4        | 2        | 8        | 6        | 4        | 5        | 63    |
| IGHG3    | 6        | 6        | 7        | 2        | 3        | 3        | 4        | 1        | 3        | 12       | 2        | 9        | 11       | 8        | 2        | 79    |
| IGHG4    | 0        | 0        | 0        | 0        | 0        | 0        | 0        | 0        | 0        | 0        | 1        | 0        | 0        | 0        | 0        | 1     |
| IGHE     | 0        | 0        | 0        | 0        | 1        | 0        | 0        | 0        | 0        | 0        | 1        | 0        | 0        | 0        | 0        | 2     |
| Total    | 71       | 262      | 69       | 77       | 176      | 43       | 41       | 21       | 24       | 137      | 51       | 77       | 87       | 81       | 84       | 1301  |

**Supplementary Table 2. Ig class distribution across patients.**

Number of QC-passed cells grouped by Ig class are shown for each patient.

| Group 1 | Group 2 | p.value | FDR    |
|---------|---------|---------|--------|
| B1a.PC  | B1a.Sp  | 0.039   | 0.29   |
| B1a.PC  | B.Fo.PC | 0.033   | 0.29   |
| B1a.PC  | B.MZ.Sp | 0.032   | 0.29   |
| B1a.PC  | B.T1.Sp | 0.024   | 0.29   |
| B1a.PC  | B.T2.Sp | 0.037   | 0.29   |
| B1a.PC  | B.T3.Sp | 0.37    | 0.37   |
| B1a.PC  | B.GC.Sp | 0.00013 | 0.002  |
| B1a.PC  | B.Fo.Sp | 0.043   | 0.29   |
| B1b.PC  | B1a.Sp  | 0.02    | 0.27   |
| B1b.PC  | B.Fo.PC | 0.025   | 0.29   |
| B1b.PC  | B.MZ.Sp | 0.026   | 0.29   |
| B1b.PC  | B.T1.Sp | 0.018   | 0.25   |
| B1b.PC  | B.T2.Sp | 0.024   | 0.29   |
| B1b.PC  | B.T3.Sp | 0.18    | 0.36   |
| B1b.PC  | B.GC.Sp | 0.00011 | 0.0018 |
| B1b.PC  | B.Fo.Sp | 0.035   | 0.29   |

**Supplementary Table 3. Results of t-test and FDR for Figure 3G.**

Peritoneal cavity B1a and B1b cells were compared by t-test with the other B cell populations in Immgen for DEG cluster 3 gene expression scores. n = 6 for B1a.PC, and n = 3 for the other populations.



|         | 1C | 11AV | 65QKR | 66K | 95L | 103L | 113YD | 116S | 152E | 152RE | 163T | 184H | 193PV | 194V |
|---------|----|------|-------|-----|-----|------|-------|------|------|-------|------|------|-------|------|
| C*06:02 | x  | x    | x     | x   | x   | x    | x     | x    | x    | x     | x    | x    | x     | x    |
| C*07:02 | x  | x    | x     | x   | x   | x    | x     | x    |      |       | x    |      |       |      |
| C*14:02 | x  |      | x     | x   | x   | x    | x     | x    | x    | x     | x    | x    | x     | x    |
| C*02:02 | x  | x    | x     | x   | x   | x    | x     | x    | x    | x     |      | x    | x     | x    |
| C*16:01 | x  | x    | x     | x   | x   | x    | x     | x    |      |       | x    | x    |       | x    |
| C*04:01 |    |      | x     | x   | x   | x    |       |      | x    | x     | x    | x    | x     | x    |
| C*18:02 | x  | x    | x     | x   | x   | x    |       |      | x    | x     | x    | x    | x     | x    |
| C*05:01 | x  | x    | x     | x   | x   | x    |       |      | x    | x     | x    | x    | x     | x    |
| C*01:02 | x  |      | x     | x   | x   | x    | x     |      | x    | x     | x    | x    | x     | x    |
| C*12:03 | x  | x    | x     | x   | x   | x    | x     | x    | x    | x     | x    | x    | x     | x    |

**Supplementary Table 4. Eplets shared among top-10 hits for 3-1E12**

Those shared among all the top-10 alleles (65QKR and 103L) were highlighted.

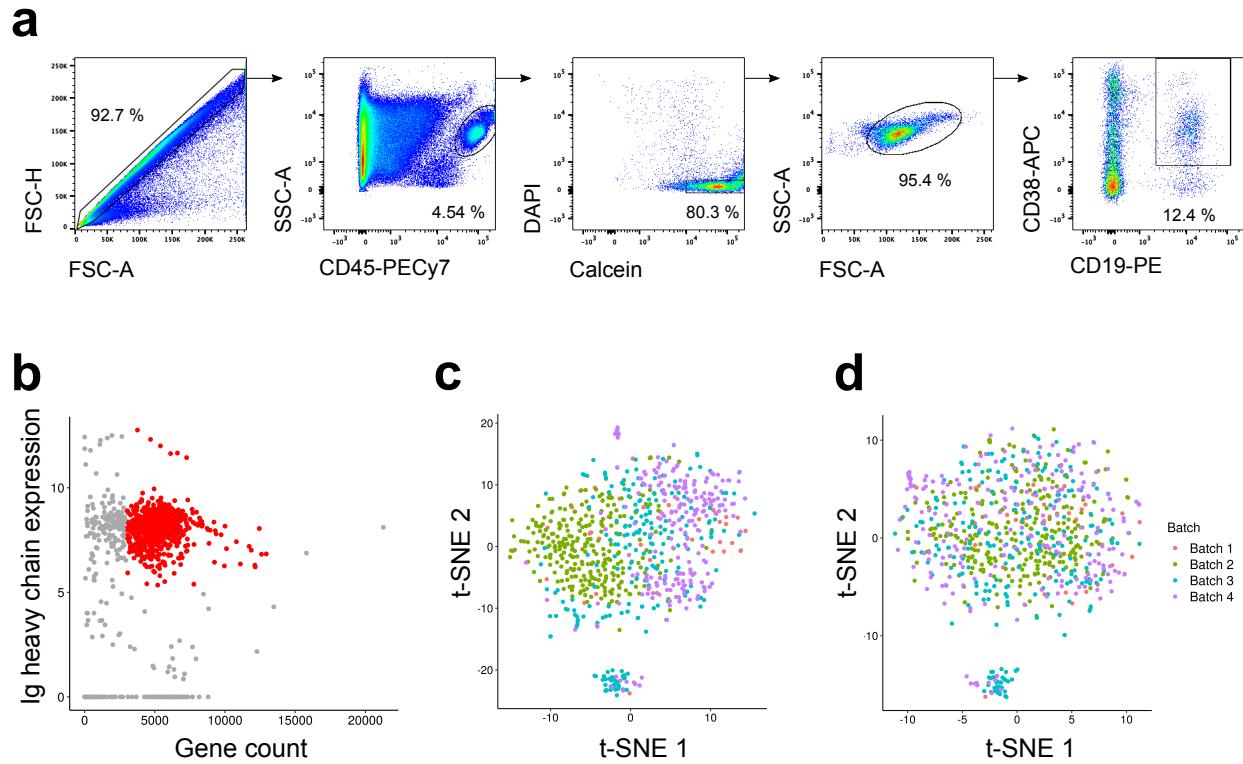

**Supplementary Figure 1. QC and normalization with ERCC spike-in to dissolve batch-dependent clusters.**

(a) A full gating strategy for intrarenal B cells in Figure 1A. (b) A scatter plot showing detected gene count and Ig heavy chain gene expression on the x and y axis respectively. Cells which passed QC are colored in red. (c and d) t-SNE plots colored by experimental batches before (c) and after (d) batch normalization with ERCC spike-in and RUVSeq.

**a**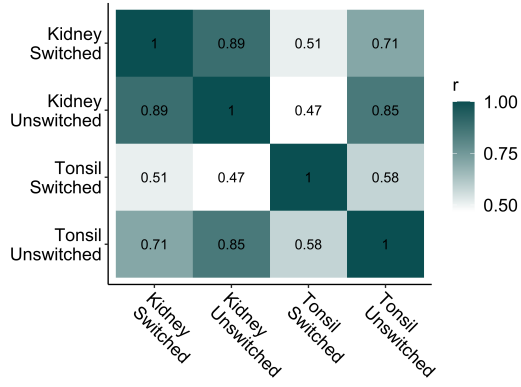**b**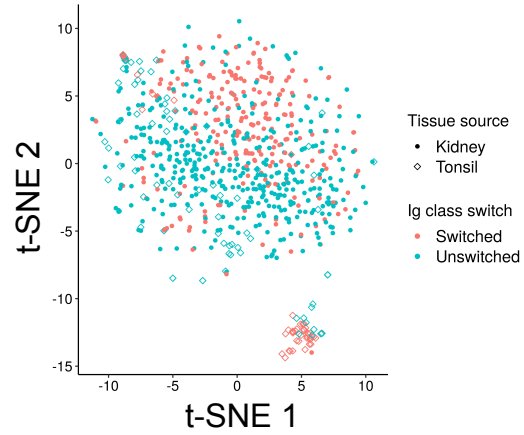**c**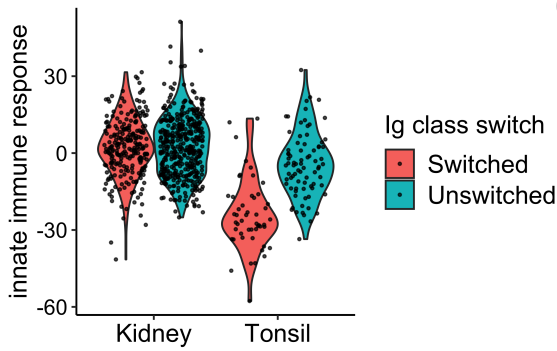**d**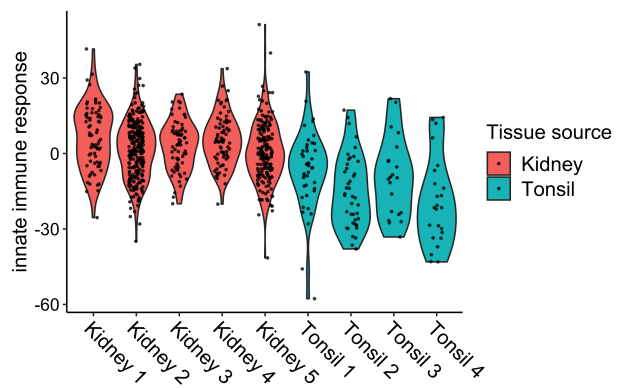**e**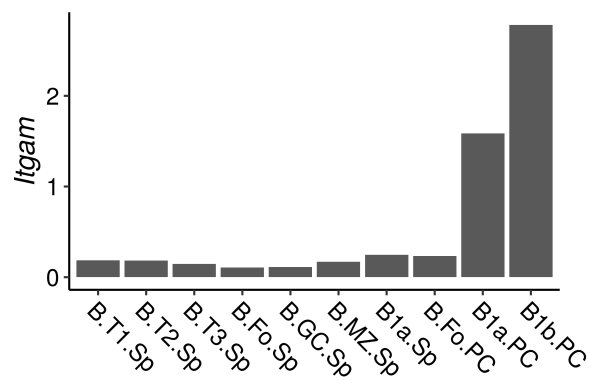**f**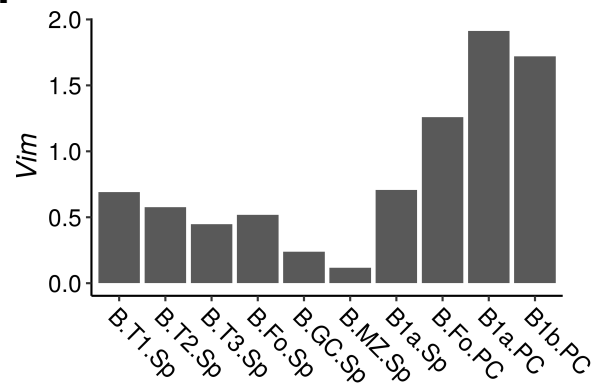**g**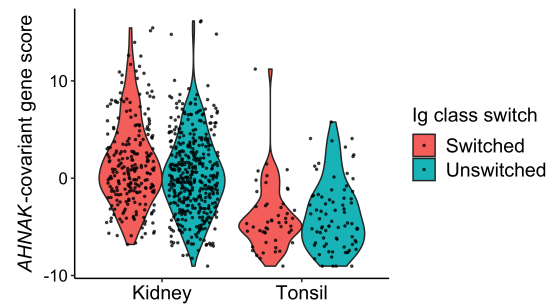

**Supplementary Figure 2. Innate immune and B1-like gene expression in intrarenal B cells.**

(a) Pearson correlation coefficients between B cell populations for expression of 1,000 most variant genes. (b) A t-SNE plot as in Figure 2A, in which Ig constant region genes were removed from the data. (c and d) A sum of scaled expression values of genes tagged to “innate immune response” GO term in cluster 2-3. Data were grouped by tissue sources (c) or patients (d). (e and f) Expression of *Itgam* (e) and *Vim* (f) in the mouse B cell subsets. (g) Gene expression scores for 13 *AHNAK*-covariant genes in DEG cluster 3 excluding *AHNAK*.

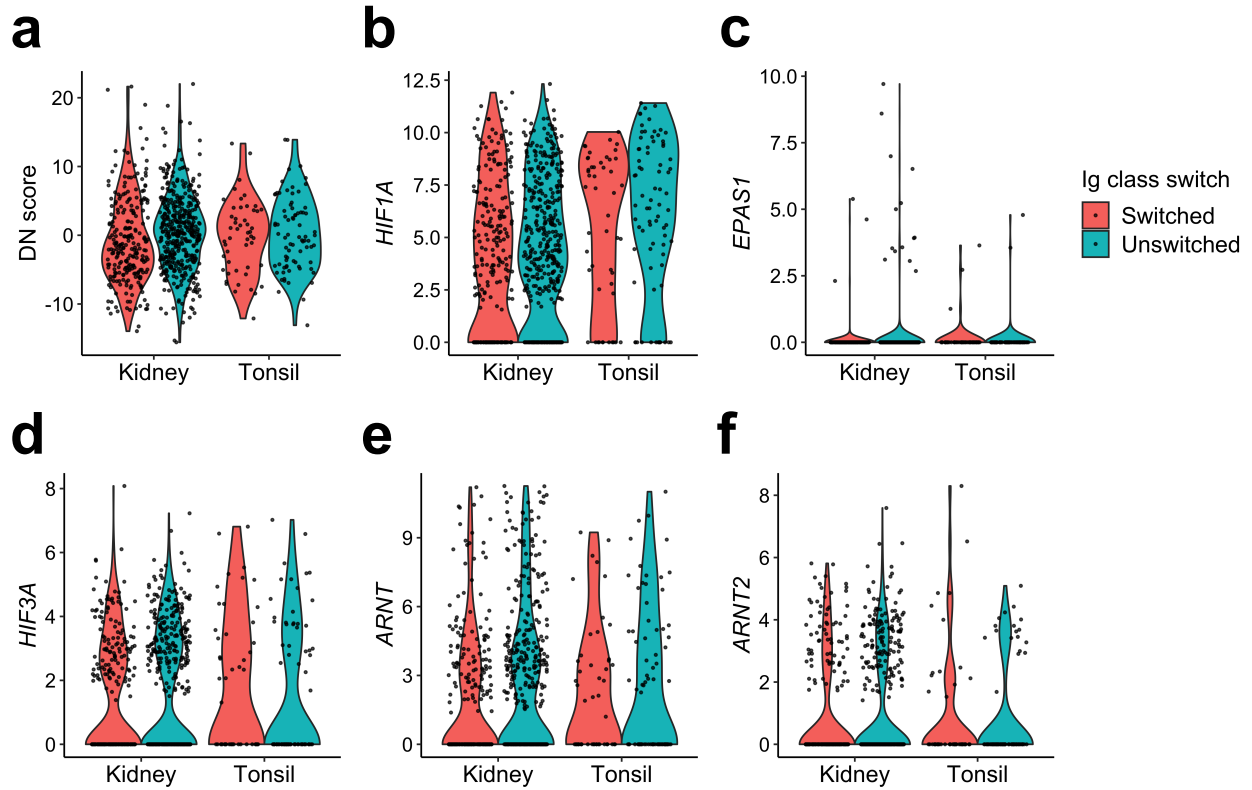

**Supplementary Figure 3. Intrarenal B cells had no association with ABC and HIF signatures.**

(a-f) Violin plots showing the gene expression of ABC-associated genes (a), *HIF1A* (b), *HIF2A* (c), *HIF3A* (d), *HIF1B* (e), or *HIF2B* (f). Cells were grouped by their tissue source and Ig class-switch state.

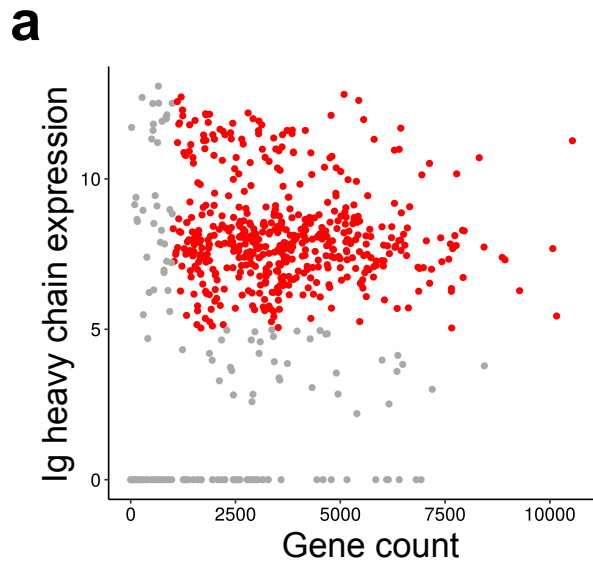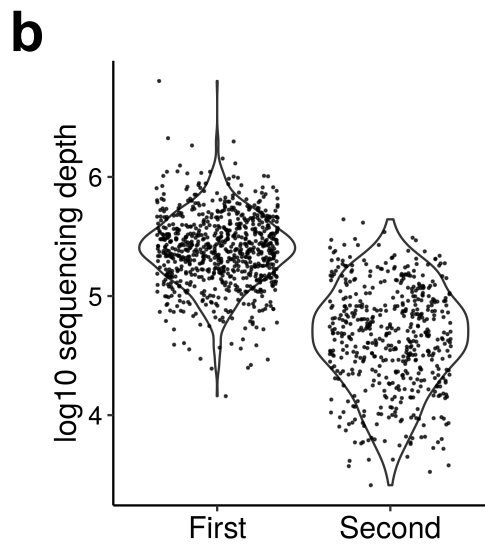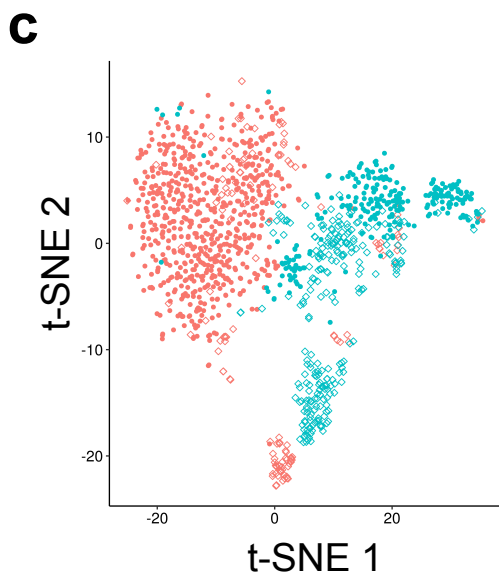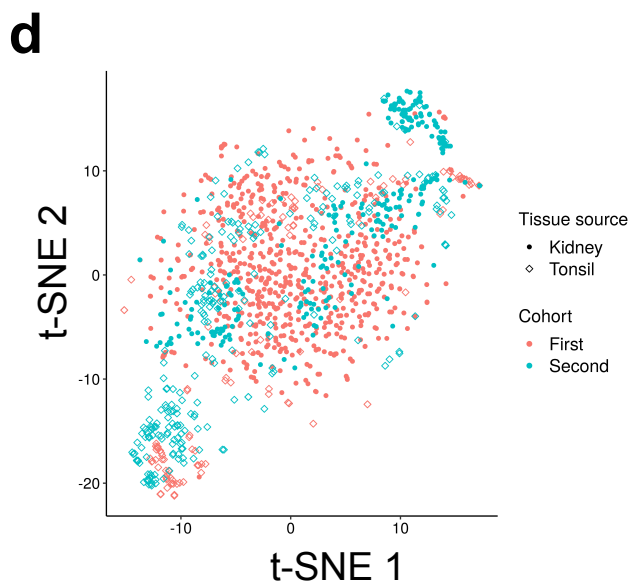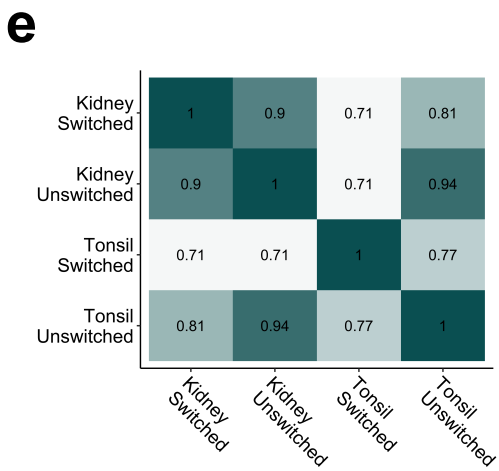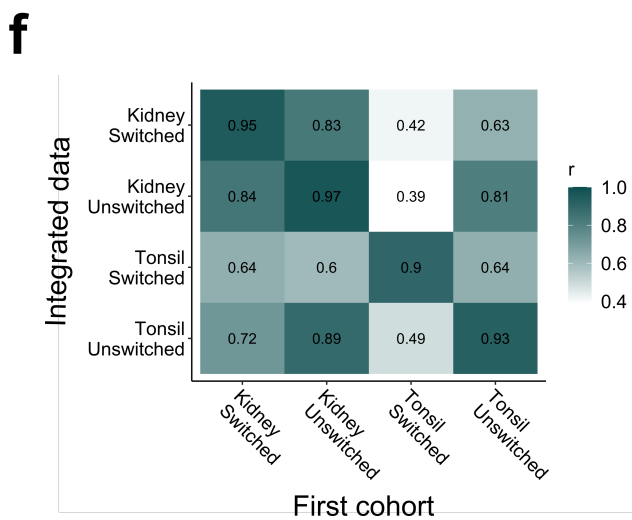

**Supplementary Figure 4. QC of the second cohort and data integration.**

(a) A scatter plot showing detected gene count and Ig Heavy chain gene expression on the x and y axis respectively. Cells which passed QC are colored in red. (b) A violin plot showing sequencing depth of cells which passed QC in each cohort. (c and d) t-SNE plots made from the data normalized by log2 cpm without data integration (c) or the data normalized by SCTransform and integrated by ComBat (d). Color and shape respectively indicate cohorts and tissue source. (e and f) Pearson correlation of gene expression of B cell populations in the integrated data. Tested within the second cohort dataset for 1,000 most variant genes (e) or against the first cohort for 736 genes which were within top 1,000 high-variant genes in both datasets (f).

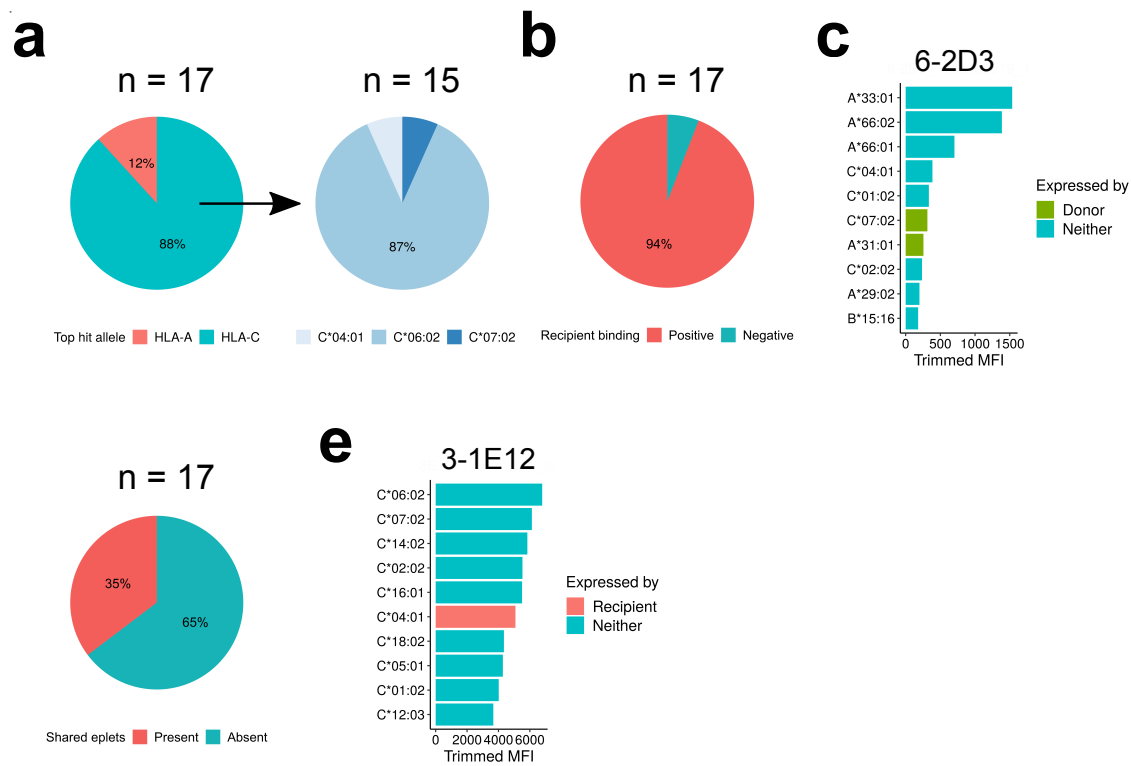

### Supplementary Figure 5. SAB assay analysis.

(a) Pie charts showing top-hit alleles in the SAB assay. 17 antibodies with trimmed MFI  $\geq 1,000$  were analyzed. (b) A ratio of antibodies that had a recipient-expressed antigen among top-10 hits. (c) Trimmed MFI of 6-2D3. Donor-expressed antigens are colored in green. (d) A ratio of antibodies whose top-10 hits shared eplets. (e) Trimmed MFI of a representative antibody 3-1E12 with a shared eplet. A recipient-expressed antigen is colored in red.



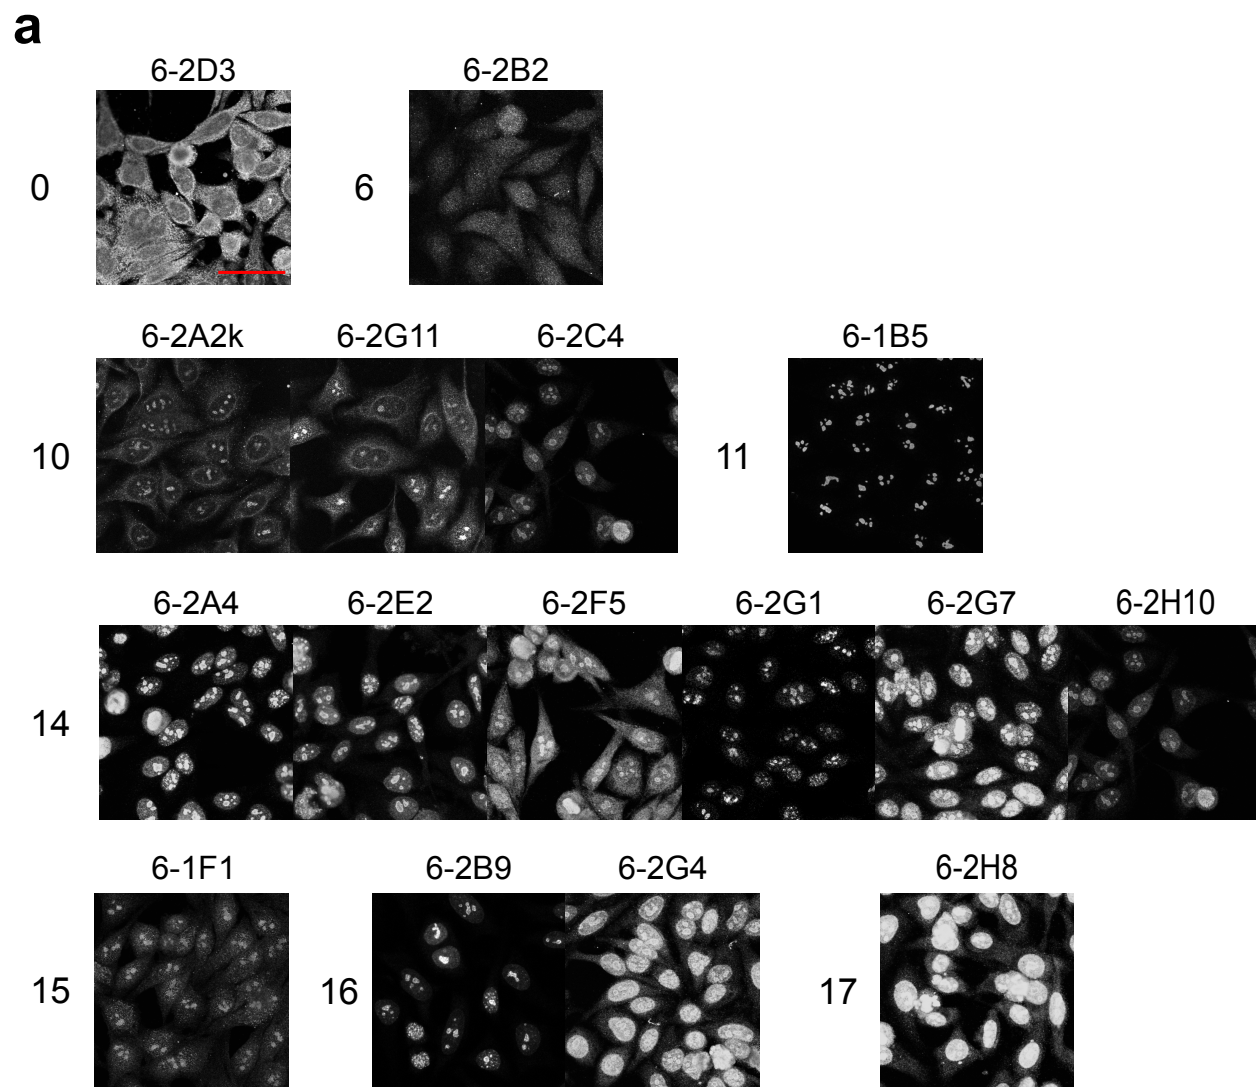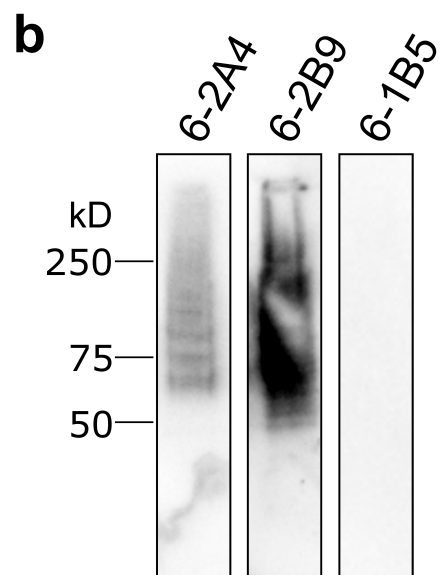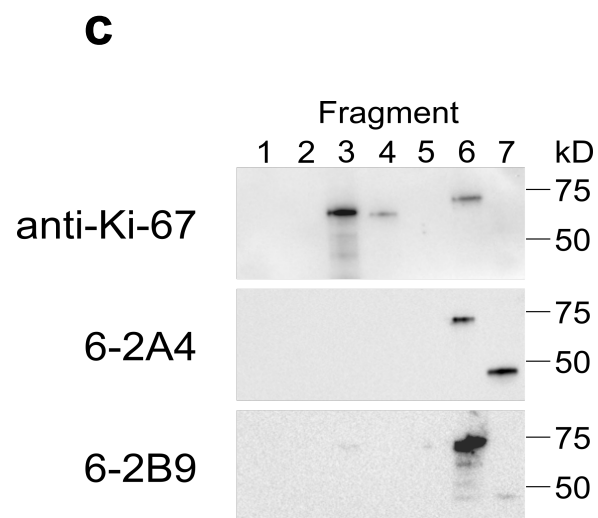

**Supplementary Figure 6. Autoreactivity of antibodies expressed by plasma cells in patient 6.**

(a) HEp-2 staining images of the 16 positive antibodies cloned from patient 6 plasma cells. Antibodies of the same clonal family are grouped together. Numbers on the left side of the images indicate their clonal family number as in Figure 6C. The scale bar indicates 50  $\mu\text{m}$ . (b) Western blot on HEp-2 nuclear lysates using the three antibodies (6-2A4, 6-2B9, 6-1B5). (c) Western blot on E. coli lysates expressing Ki-67 fragments. Each fragment contains these amino acids: fragment 1, aa 1-526; fragment 2, aa 509-1009; fragment 3, aa 994-1489; fragment 4, aa1476-1976; fragment 5, aa1963-2459; fragment 6, aa2446-2940; and fragment 7, aa2927-aa3256. Experiments for (a-c) have been repeated twice and a representative image is shown. Uncropped western blot images are provided in the Source Data file.
